# Supplementary material for: Inactivation of human angiotensin converting enzyme by copper peptide complexes containing ATCUN motifs
Source: Royal Society of Chemistry journal article supplement (doi:10.1039/b511081e), 2005-01-01
Supplement: b511081e.pdf [file b511081e.pdf]

## Supplementary data

### Inactivation of Human Angiotensin Converting Enzyme by Copper Peptide Complexes Containing ATCUN Motifs.

Nikhil H. Gokhale and J. A. Cowan\*

Evans Laboratory of Chemistry, Ohio State University, 100 West 18<sup>th</sup> Avenue, Columbus, Ohio 43210

#### SUPPORTING MATERIAL

##### 1. Materials and Methods

**1.1 Determination of Kinetic Constants.** Determination of  $K_m$  and  $V_{max}$  values was carried out using the same fluorescence assay as described earlier. Reactions were carried out for 30 min at 37 °C. Initial rates for the hydrolysis of substrate ( $V_o$ ) were determined by following the change in fluorescence (relative fluorescence units/min, RFU/min), plotted as a function of substrate concentration ( $[S]$ ) and fit to the Michaelis-Menten equation  $V_o = V_{max} [S] / ([S] + K_m)$ , using Origin software (Microcal) to determine  $K_m$ . Substrate concentration was varied from 0 to 20  $\mu$ M (Figure SM1 to SM4).

**1.2 Determination of  $IC_{50}$  values for rhACE inhibitors using, Mca-Arg-Pro-Pro-Gly-Phe-Ser-Ala-Phe-Lys(Dnp)-OH substrate.** Reaction mixtures (100  $\mu$ L) contained 50 mM HEPES buffer, 300 mM NaCl and 10  $\mu$ M  $ZnCl_2$  (pH 7.4), 10  $\mu$ M substrate and 1nM (13.1 ng) rhACE. Concentrations of GGH, KGHK, YIHPF,  $Cu^{2+}$ ,  $Cu(GGH)^+$ ,  $Cu(KGHK)^+$ ,  $Cu(YIHPF)^+$ , were varied from 0 to 100  $\mu$ M. Prior to the start of the enzymatic reaction (by addition of substrate) the inhibitors were pre-incubated with the enzyme for 45 min. Reactions were run in the wells of polystyrene 96-well microplates (Corning) as described previously. Fluorescence was measured for 70 min. and the background rate determined for samples containing no rhACE was subtracted from all reactions to calculate the initial rates in RFU/min. Initial rate data were plotted as percentage activity, relative to uninhibited control reactions, as a function of inhibitor concentration (Figure SM5 to SM9).

**1.3 Determination of the Type of Inhibition.** Reaction mixtures (100  $\mu$ L) contained 50 mM HEPES buffer, 300 mM NaCl, 10  $\mu$ M  $ZnCl_2$  (pH 7.4) and 1nM (13.1 ng) rhACE. Two sets of reactions were performed at distinct substrate concentration (5 and 10  $\mu$ M) with varying concentrations of inhibitor (0 to 20  $\mu$ M). Prior to the start of the enzymatic reaction (by addition of substrate) the inhibitors were pre-incubated with the enzyme for 45 min. Reactions were run in the wells of polystyrene 96-well microplates (Corning). Fluorescence change was measured for 30 min as described previously. Initial rate data were plotted versus inhibitor concentration and a Dixon plot (inverse of initial velocity versus inhibitor concentration) was generated using Origin (Microcal).

**1.4 Determination of Inhibition Constants.** For the competitive inhibitors the enzyme-inhibitor dissociation constant ( $K_i$ ) was determined by graphical methods by use

of a Dixon plot, as well as by the equation below, where  $IC_{50}$ ,  $[S]$  and  $K_m$  have units of molar concentration.

$$K_I = IC_{50} / (1 + [S]/K_m)$$

### **1.5 Determination of the Inhibition Mechanism under Oxidative Reaction**

**Conditions.** Enzymatic reactions performed in the presence of dioxygen and ascorbate are defined as oxidative conditions, while all other reactions described herein that contained no ascorbate are defined as hydrolytic. Reaction mixtures (100  $\mu$ L) contained 50 mM HEPES buffer, 300 mM NaCl, 10  $\mu$ M  $ZnCl_2$  (pH 7.4), 10  $\mu$ M ascorbate (L-ascorbic acid, prepared in deionized water) and 1 nM (13.1 ng) rhACE. The concentration of inhibitor was set at  $K_I$ . Prior to the start of the enzymatic reaction (either by addition of substrate or the enzyme) the inhibitors were pre-incubated with the enzyme for 45 min. Two sets of reactions were run in the wells of polystyrene 96-well microplates (Porvair) and fluorescence change (relative fluorescence units/min, RFU/min) was measured for 30 min as described previously.

#### **Set I: Monitoring the progress curve for the enzymatic reaction under oxidative conditions:**

Following prior pre-incubation of the enzyme with the inhibitor, the enzymatic reaction was initiated by simultaneous addition of the substrate and ascorbate, and the progress of the reaction monitored by formation of product as reflected by the observed change of fluorescence. The initial velocity ( $V_o$ ), obtained from the progress curve in the presence and absence of the inhibitor, was plotted versus time as described. Respective control reactions had either ascorbate present or absent (Figure SM10 and Figure SM11).

#### **Set II: Enzyme deactivation under oxidative conditions in the presence and absence of inhibitor:**

To obtain a true rate of enzyme deactivation by the inhibitor under oxidative conditions the enzyme was pre-incubated with the inhibitor for 45 min. Ascorbate was added, followed by a preincubation time, and aliquots of the reaction mixture were taken at various time intervals and the residual enzyme activity estimated using the 96-well plate assay described previously. Initial velocity ( $V_o$ ) obtained in the presence and absence of inhibitor was plotted as a function of time and fitted to the first-order rate equation to obtain  $k_{obs}$ .

**Figures for Supplementary Material.**

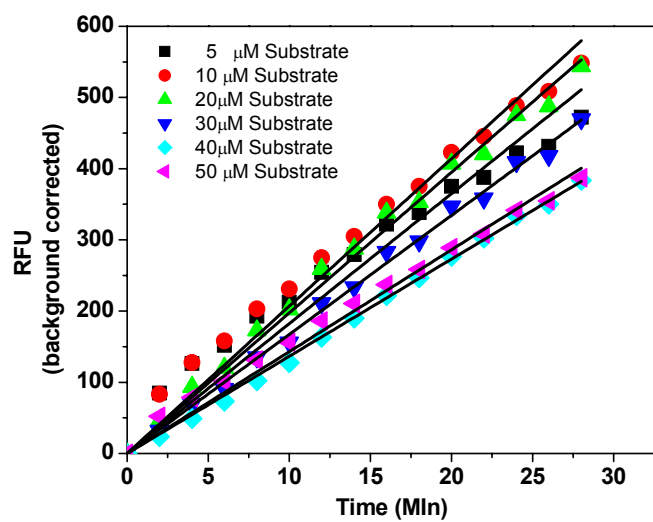

Figure SM1

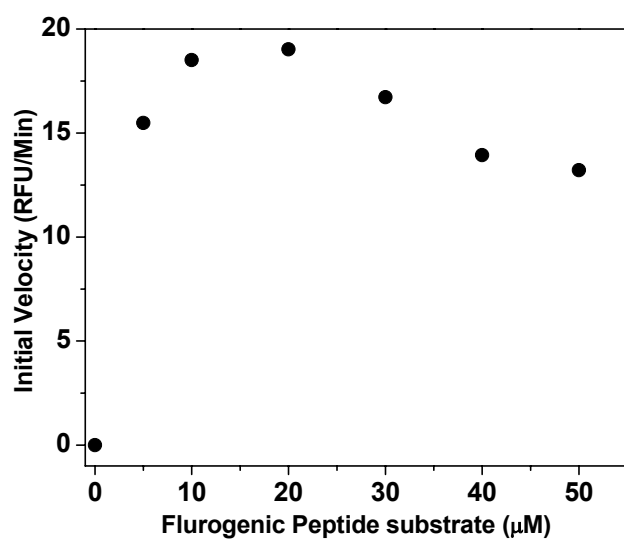

Figure SM2

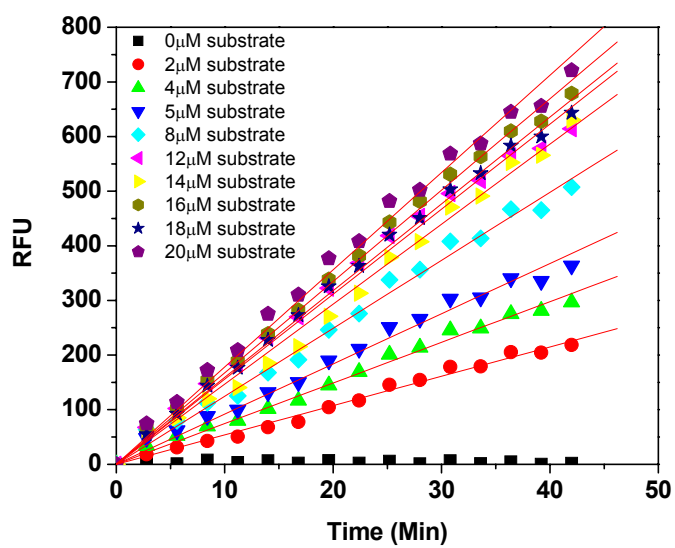

Figure SM3

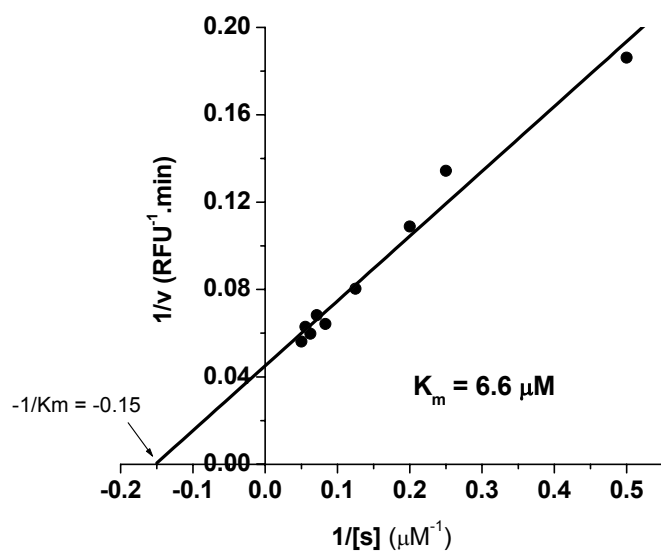

Figure SM4

Dose Dependence GGH

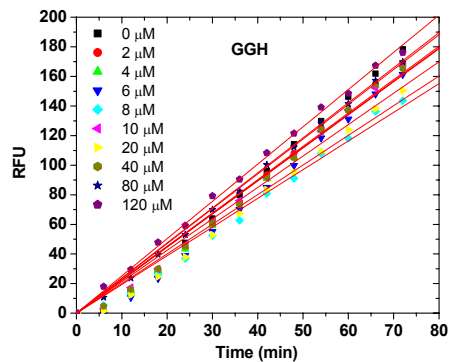

Dose Dependence KGHK

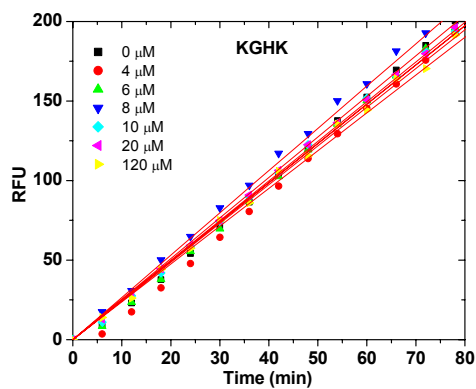

Dose Dependence YIHPF

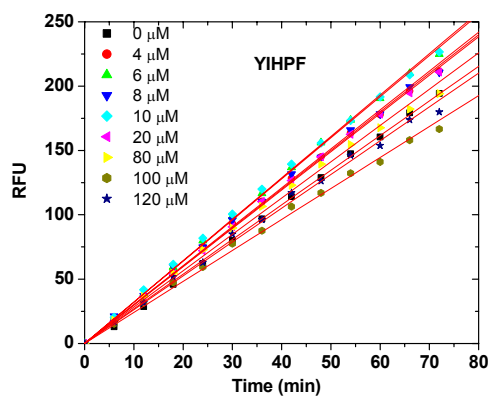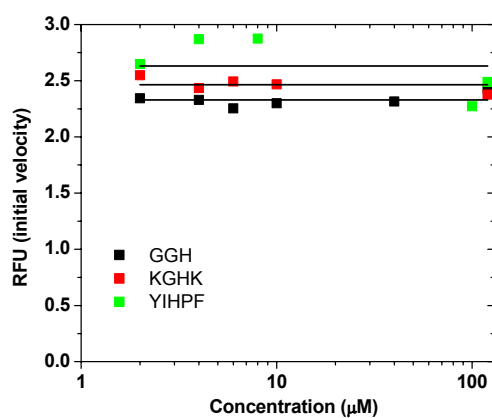

Figure SM5

**For  $\text{Cu}^{2+}$**

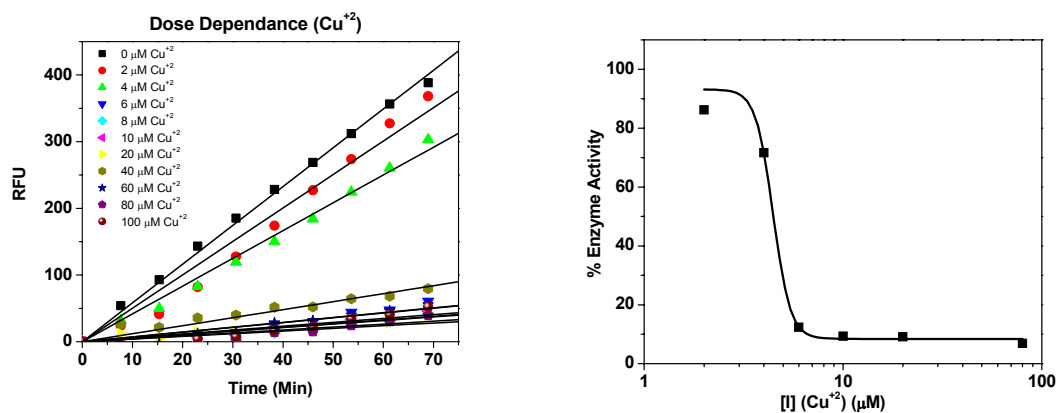

Figure SM6  
**For  $\text{Cu}(\text{GGH})^-$**

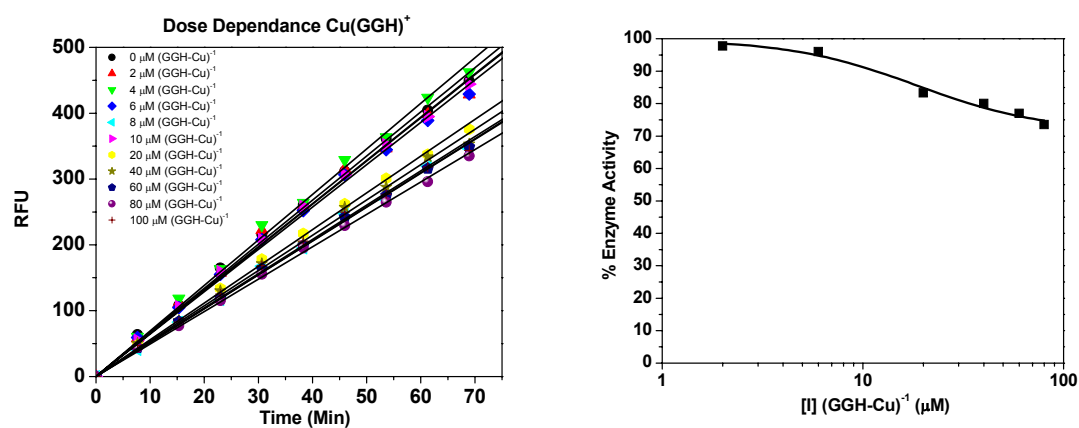

Figure SM7  
**For  $\text{Cu}(\text{KGHK})^+$**

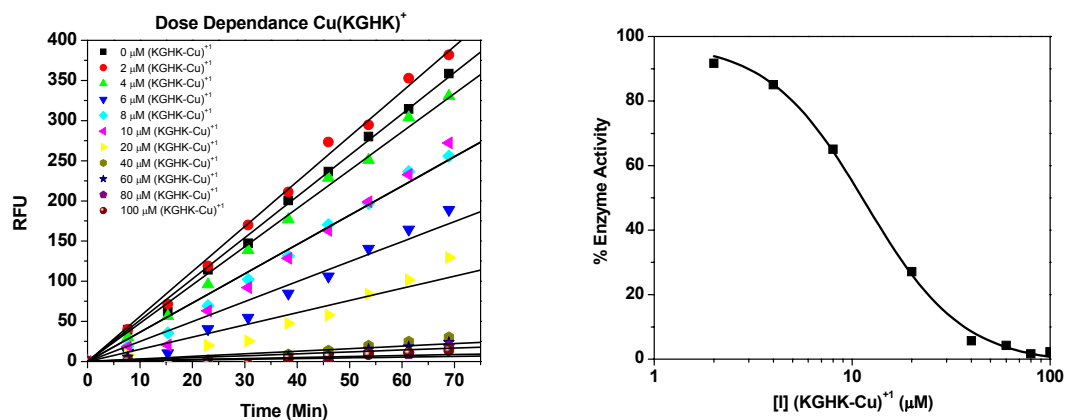

Figure SM8  
**For Cu(YIHPF)<sup>+</sup>**

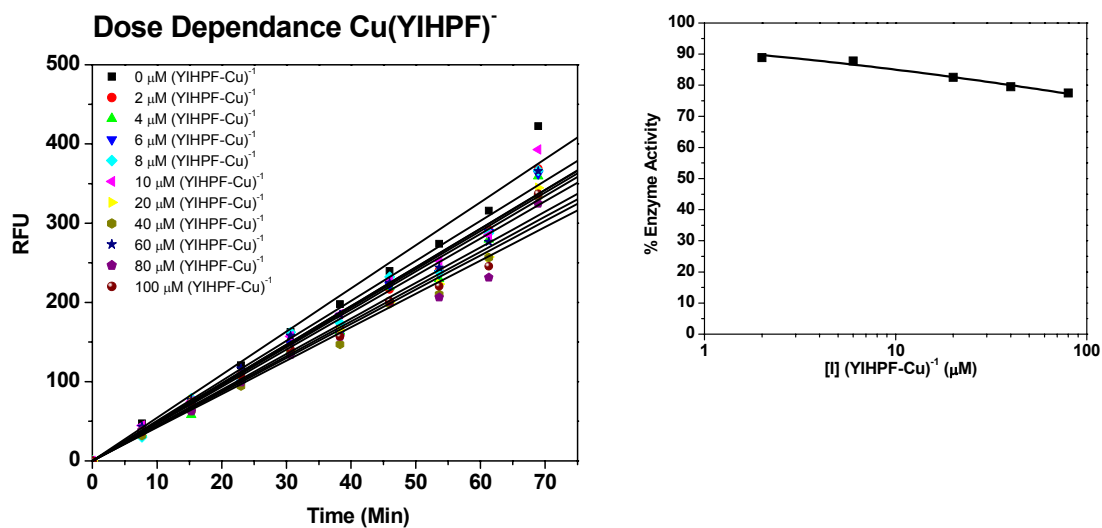

Figure SM9

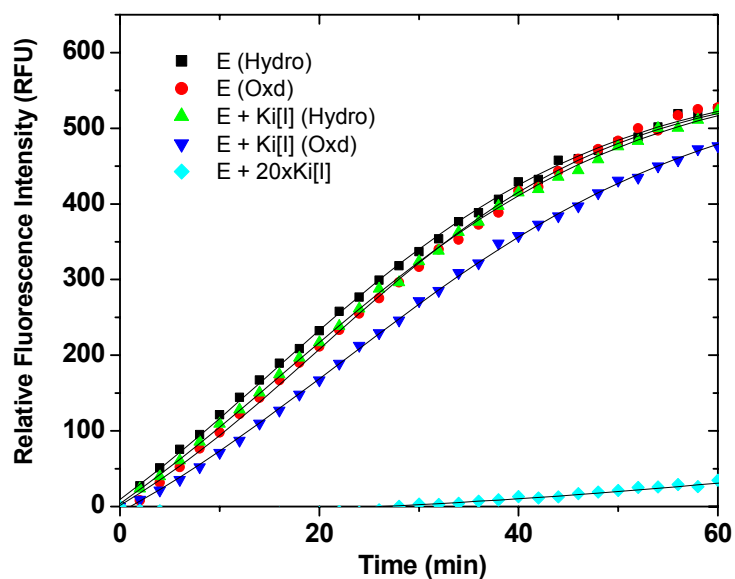

Figure SM10. Plot of RFU with time (min) under various experimental conditions (progress curve), where E(hydro) is the hydrolytic control, E(Oxd) is the oxidative control, E + K(I)(Hydro) contains the inhibitor at a concentration of  $4\mu\text{M}$  under hydrolytic conditions, E + K(I)(Oxd) contains the inhibitor at a concentration of  $K_i$  under oxidative conditions, and E + 20xK(I) ) contains the inhibitor at a concentration 20-fold higher than  $K_i$  under oxidative conditions

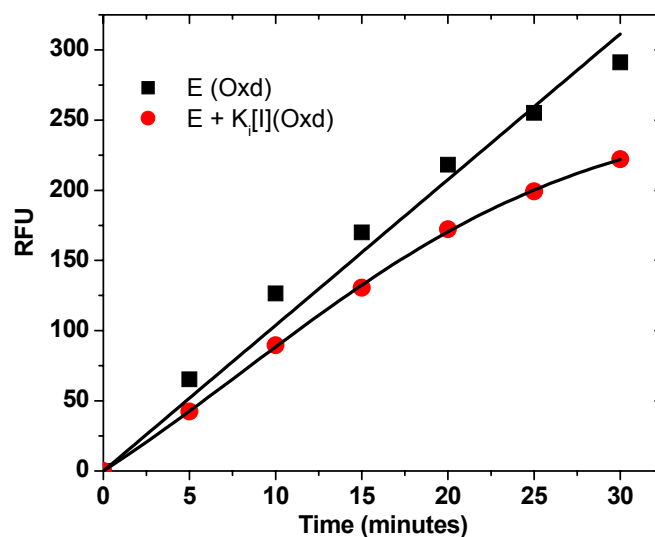

Figure SM11. Plot of RFU with time (min) under oxidative experimental conditions (progress curve), where E (Oxd) is the oxidative control, E + K(I)(Oxd) contains the

Supplementary Material for Chemical Communications  
This journal is © The Royal Society of Chemistry 2005

inhibitor at a concentration of  $K_I$  under oxidative conditions.
